# Supplementary material for: Enantioselective Biomimetic Structures Inspired by Oxi-Dase-Type Metalloenzymes, Utilizing Polynuclear Compounds Containing Copper (II) and Manganese (II) Ions as Building Blocks
Source: MDPI journal article supplement (doi:10.3390/biomimetics8050423), 2023-09-12
Supplement: s1 [file s1]

## Supplementary Information

**Table S1.** IR spectra for trinuclear racemic copper compound

| Vibration           | $\nu(-OH)_{st}$ | $\nu(CH)_{st}$<br>aromatic | $\nu_{as}(-COO^-)_{st}$ | $\nu_s(-COO^-)_{st}$ | $\Delta\nu$          | $\nu(C-OH)_{st}$ |
|---------------------|-----------------|----------------------------|-------------------------|----------------------|----------------------|------------------|
| Ligand              | 3063            | 2988                       | 1633                    | 1384                 | -----                | 1041             |
| AO biomimetic model | 3214            | 2825                       | 1615                    | 1385                 | 230<br>(Monodentate) | ---              |

**Table S2.** IR spectra for polymeric manganese compounds

| Vibration                                                                                                                                                                          | $\nu(-OH)_{st}$ | $\nu(CH)_{st}$<br>aromatic | $\nu_{as}(-COO^-)_{st}$ | $\nu_s(-COO^-)_{st}$ | $\Delta\nu$     | $\nu(C-OH)_{st}$ | M-ClO <sub>4</sub>                                    |
|------------------------------------------------------------------------------------------------------------------------------------------------------------------------------------|-----------------|----------------------------|-------------------------|----------------------|-----------------|------------------|-------------------------------------------------------|
| Ligand                                                                                                                                                                             | 3063            | 2988                       | 1633                    | 1384                 | -----           | 1041             | -----                                                 |
| [Mn <sub>2</sub> (R,R(-)<br>)Hcpse) <sub>4</sub> (NaClO <sub>4</sub> ) <sub>2</sub> (NaO<br>H)(MeOH)]n·<br>(EtOH) <sub>2n</sub> ·(MeOH) <sub>n</sub> H <sub>2</sub> O <sub>n</sub> | 3217            | 2880                       | 1569                    | 1443                 | 126<br>(Bridge) | ---              | $\nu_2$ (1019)<br>$\nu_3$ (1082)<br>$\nu_4$ (927)     |
| [Mn <sub>2</sub> (S,S(-)<br>)Hcpse) <sub>4</sub> (NaClO <sub>4</sub> ) <sub>2</sub> (NaO<br>H)(MeOH)]n·<br>(EtOH) <sub>2n</sub> ·(MeOH) <sub>n</sub> H <sub>2</sub> O <sub>n</sub> | 3588            | 2979                       | 1569                    | 1414                 | 155<br>(Bridge) | ---              | $\nu_2$ (1021)<br>$\nu_3$ (1092<br>)<br>$\nu_4$ (932) |

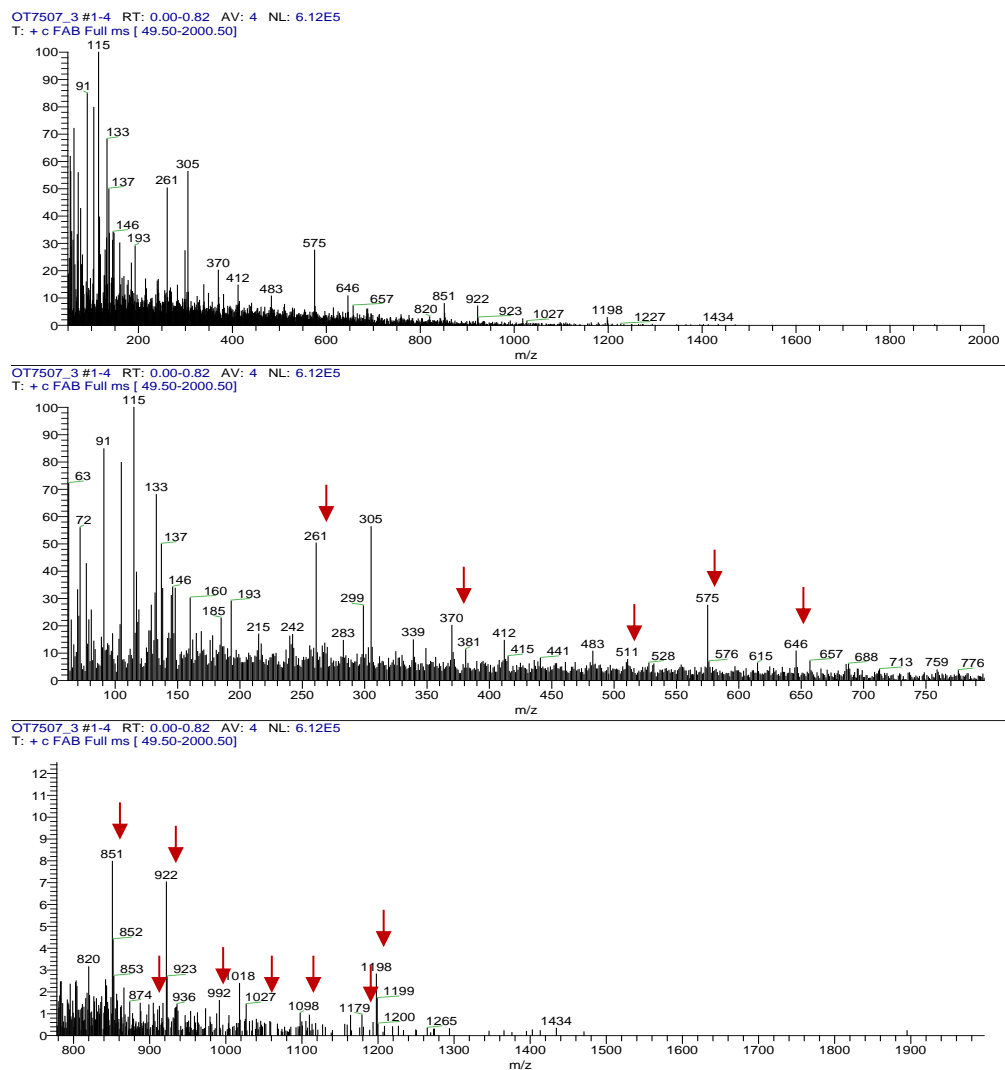

**Figure S3.** Mass spectrum FAB<sup>+</sup> of [Mn<sub>2</sub>(R,R(-)Hcpse)<sub>4</sub>(NaClO<sub>4</sub>)<sub>2</sub>(NaOH)(MeOH)]<sub>n</sub> · (EtOH)<sub>2n</sub> · (MeOH)<sub>n</sub>H<sub>2</sub>O<sub>n</sub>

**Table S4.** Fragmentation pattern for Mass spectrum corresponding to  $[\text{Mn}_2(\text{R,R}(-)\text{Hcpse})_4(\text{NaClO}_4)_2(\text{NaOH})(\text{MeOH})]_n \cdot (\text{EtOH})_{2n} \cdot (\text{MeOH})_n \cdot \text{H}_2\text{O}_n$

| Peake | (m/z)                                                                                  | Assignment                                                                             |
|-------|----------------------------------------------------------------------------------------|----------------------------------------------------------------------------------------|
| 1322  | Dimeric unit<br>1323.20                                                                | $(\text{C}_{48}\text{H}_{67}\text{Cl}_2\text{Mn}_2\text{N}_4\text{Na}_4\text{O}_{22})$ |
| 1198  | 121.94 $(\text{ClNaO}_4)$                                                              | $(\text{C}_{48}\text{H}_{67}\text{ClMn}_2\text{N}_4\text{Na}_3\text{O}_{18})$          |
| 1179  | 149 $(\text{ClNa}_2\text{O}_4)$                                                        | $(\text{C}_{48}\text{H}_{67}\text{ClMn}_2\text{N}_4\text{Na}_2\text{O}_{18})$          |
| 1098  | 219 $(\text{Cl}_2\text{Na}_2\text{O}_8)$                                               | $(\text{C}_{48}\text{H}_{67}\text{ClMn}_2\text{N}_4\text{Na}_3\text{O}_{14})$          |
| 1027  | 274.9 $(\text{Cl}_2\text{Na}_3\text{O}_9\text{CH}_3)$                                  | $(\text{C}_{47}\text{H}_{64}\text{Mn}_2\text{N}_4\text{NaO}_{13})$                     |
| 992   | 306.92 $(\text{Cl}_2\text{Na}_3\text{O}_9\text{CH}_3)$                                 | 993.29 $(\text{C}_{46}\text{H}_{59}\text{Mn}_2\text{N}_4\text{NaO}_{12})$              |
| 922   | 403 $(\text{Cl}_2\text{Na}_3\text{O}_{10}\text{C}_8\text{H}_{20})$                     | 920.18 $(\text{C}_{41}\text{H}_{56}\text{Mn}_2\text{N}_4\text{NaO}_{12})$              |
| 874   | 445.19 $(\text{Cl}_2\text{Na}_3\text{O}_{10}\text{C}_8\text{H}_{20})$                  | 877.13 $(\text{C}_{38}\text{H}_{39}\text{Mn}_2\text{N}_4\text{NaO}_{12})$              |
| 851   | 472.06 $(\text{Cl}_2\text{Na}_3\text{O}_{10}\text{C}_{10}\text{H}_{27})$               | 851.11 $(\text{C}_{36}\text{H}_{39}\text{Mn}_2\text{N}_4\text{NaO}_{12})$              |
| 657   | 669.12 $(\text{ClNaO}_{12}\text{MnN}_2\text{C}_{25}\text{H}_{36})$                     | 654.07 $(\text{C}_{23}\text{H}_{31}\text{ClMnN}_8\text{O}_{10})$                       |
| 575   | 744.87 $(\text{C}_{24}\text{H}_{34}\text{MnN}_2\text{Na}_3\text{O}_{15})$              | 574.13 $(\text{C}_{24}\text{H}_{33}\text{ClMnN}_2\text{NaO}_7)$                        |
| 511   | 824.07 $(\text{Cl}_2\text{Na}_4\text{O}_{16}\text{MnN}_2\text{C}_{25}\text{H}_{39})$   | 499.16 $(\text{C}_{24}\text{H}_{32}\text{MnN}_2\text{O}_6)$                            |
| 483   | 839.09 $(\text{Cl}_2\text{Na}_4\text{O}_{15}\text{MnN}_2\text{C}_{26}\text{H}_{42})$   | 484.14 $(\text{C}_{23}\text{H}_{29}\text{MnN}_2\text{O}_6)$                            |
| 412   | 913.13 $(\text{Cl}_2\text{Na}_4\text{O}_{17}\text{MnN}_2\text{C}_{29}\text{H}_{48})$   | 410.10 $(\text{C}_{20}\text{H}_{23}\text{MnN}_2\text{O}_4)$                            |
| 370   | 928.15 $(\text{Cl}_2\text{Na}_4\text{O}_{17}\text{MnN}_2\text{C}_{30}\text{H}_{51})$   | 369.06 $(\text{C}_{17}\text{H}_{18}\text{MnN}_2\text{O}_4)$                            |
| 115   | $(\text{C}_{47}\text{H}_{63}\text{Cl}_2\text{Mn}_2\text{N}_4\text{Na}_3\text{O}_{17})$ | $(\text{CH}_4\text{NaO}_5)$                                                            |

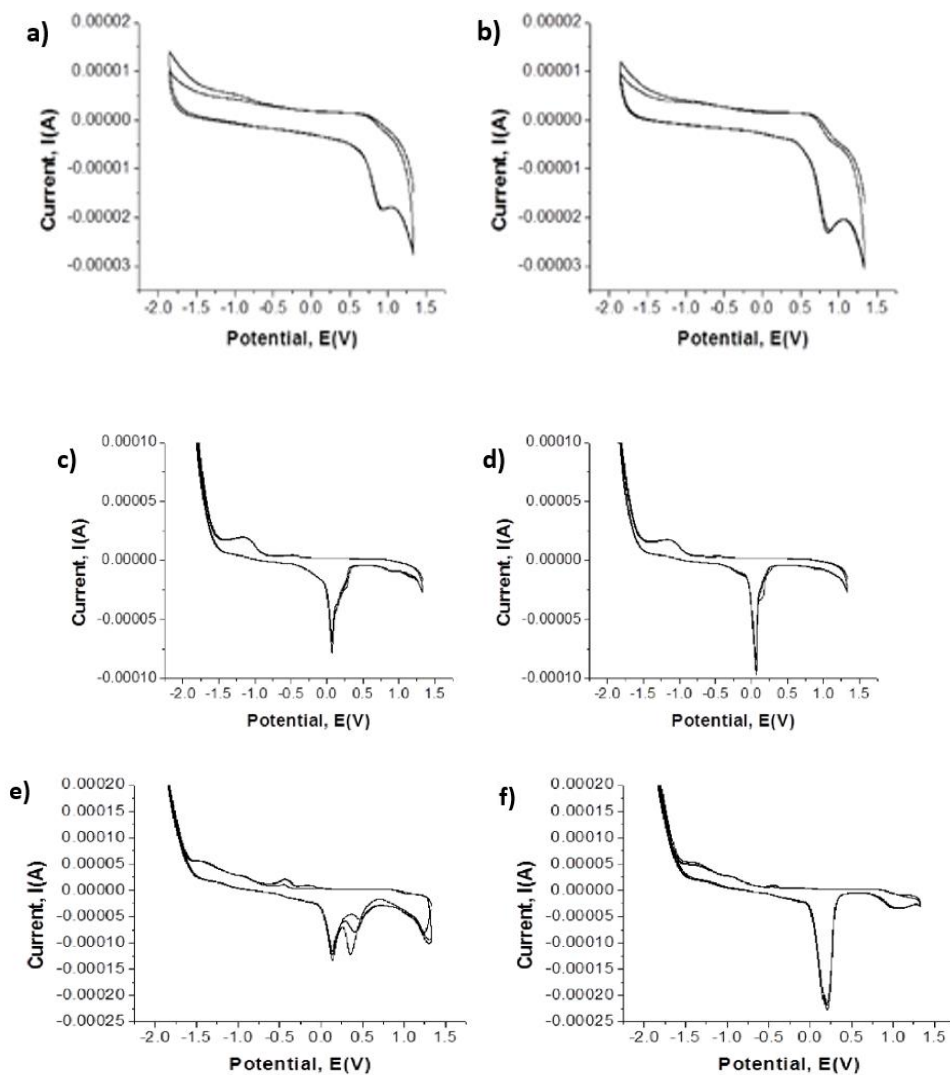

**Figure S5.** Electrochemical analyses for compound **1**. a). Cyclic voltammograms vs. NHE for the ligands (+)S,S-H<sub>2</sub>cpse (1 mM), b). (-)R,R-H<sub>2</sub>cpse (1 mM), c). [Cu(S,S(+)-Hcpse)<sub>2</sub>] (1 mM) d). [Cu(R,R(-)-Hcpse)<sub>2</sub>] (1 mM), e). [Cu<sub>3</sub>(S,S(+)-cpse)<sub>3</sub>](1 mM), and f). [Cu<sub>3</sub>(R,R(-)-cpse)<sub>3</sub>] (1 mM) in methanol with 0.1 M tetrabutylammonium hexafluorophosphate (n-Bu<sub>4</sub>NPF<sub>6</sub>) as supporting electrolyte.

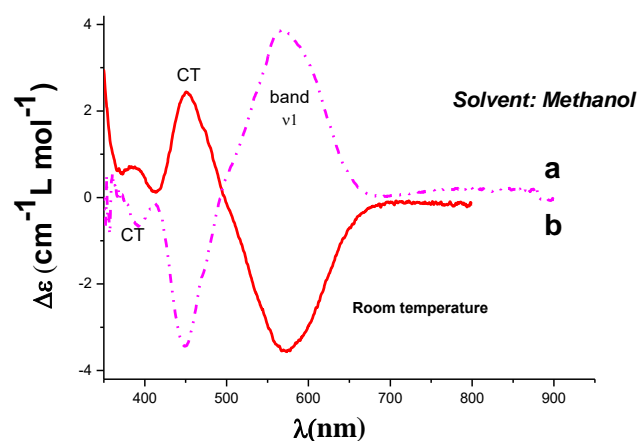

**Figure S6.** CD spectra for the manganese polymeric compounds.  
**a.**  $[\text{Mn}_2(\text{R,R}(-)\text{Hcpse})_4(\text{NaClO}_4)_2(\text{NaOH})(\text{MeOH})]_n \cdot (\text{EtOH})_{2n} \cdot (\text{MeOH})_n \text{H}_2\text{O}_n$  and  
**b.**  $[\text{Mn}_2(\text{S,S}(-)\text{Hcpse})_4(\text{NaClO}_4)_2(\text{NaOH})(\text{MeOH})]_n \cdot (\text{EtOH})_{2n} \cdot (\text{MeOH})_n \text{H}_2\text{O}_n$

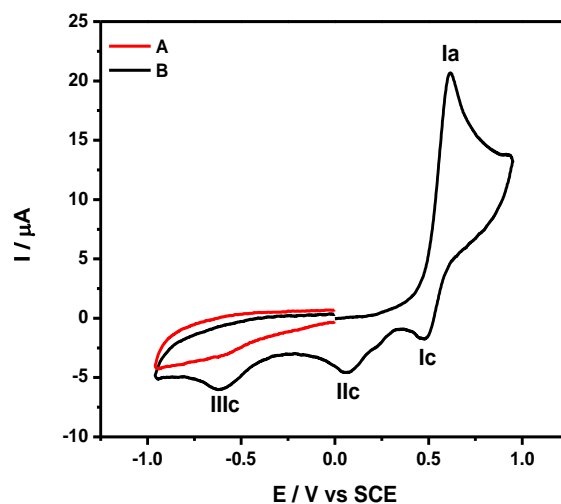

**Figure S7.** Cyclic voltammetry for compound **3** at ~1 mM, on glassy carbon electrode ( $\phi = 3$  mm), in acetonitrile containing  $n\text{-Bu}_4\text{NPF}_6$  0.1 M. a) positive direction starting scan, b) negative direction starting scan. Scan rate:  $0.1 \text{ V s}^{-1}$  for  $[\text{Mn}_2(\text{R,R}(-)\text{Hcpse})_4(\text{NaClO}_4)_2(\text{NaOH})(\text{MeOH})]_n \cdot (\text{EtOH})_{2n} \cdot (\text{MeOH})_n \text{H}_2\text{O}_n$

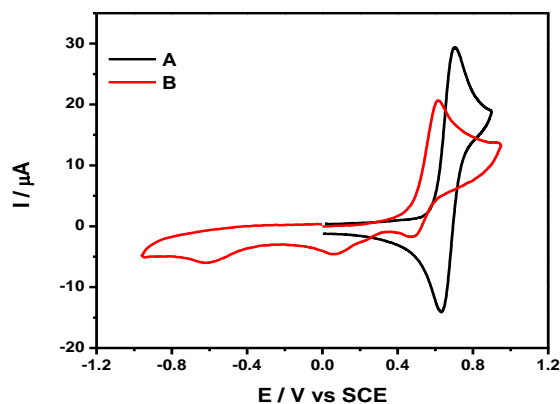

**Figure S8.** Comparison of the current due to the oxidation of ferrocenecarboxaldehyde 1 mM (A) and compound **3** at  $\sim 1\text{ mM}$  (B), on glassy carbon electrode ( $\phi = 3\text{ mm}$ ), in acetonitrile containing  $n\text{-Bu}_4\text{NPF}_6$  0.1 M, at a scan rate of  $0.1\text{ V s}^{-1}$  for  $[\text{Mn}_2(\text{R,R}(-)\text{Hcpse})_4(\text{NaClO}_4)_2(\text{NaOH})(\text{MeOH})]_n \cdot (\text{EtOH})_{2n} \cdot (\text{MeOH})_n \text{H}_2\text{O}_n$

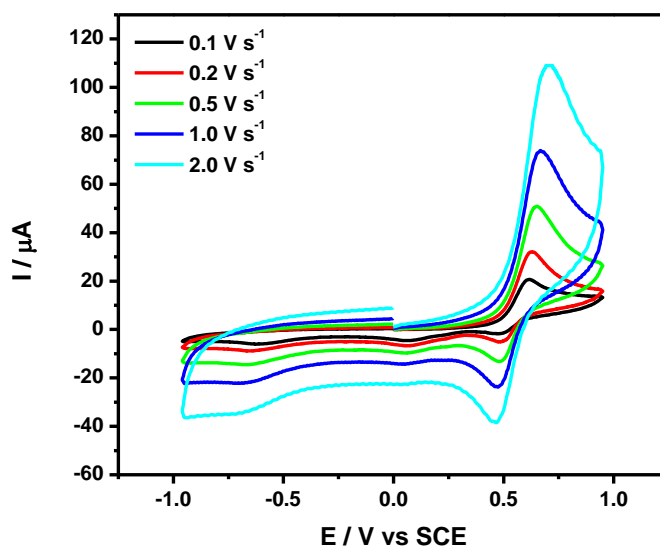

**Figure S9.** Cyclic voltammetry at different scan rates for compound **3** at  $\sim 1\text{ mM}$ , on glassy carbon electrode ( $\phi = 3\text{ mm}$ ), in acetonitrile containing  $n\text{-Bu}_4\text{NPF}_6$  0.1 M for  $[\text{Mn}_2(\text{R,R}(-)\text{Hcpse})_4(\text{NaClO}_4)_2(\text{NaOH})(\text{MeOH})]_n \cdot (\text{EtOH})_{2n} \cdot (\text{MeOH})_n \text{H}_2\text{O}_n$
